# Supplementary material for: Reference gene validation for quantification of gene expression during ovarian development of turbot (Scophthalmus maximus)
Source: PubMed Central journal article supplement (PMC6972784; doi:10.1038/s41598-020-57633-3), 2020-01-21
Supplement: 41598_2020_57633_MOESM1_ESM.pdf [file 41598_2020_57633_MOESM1_ESM.pdf]

**Reference gene validation for quantification of gene expression during  
ovarian development of turbot (*Scophthalmus maximus*)**

**Yunhong Gao<sup>a,b</sup>, Yuntao Gao<sup>a,b</sup>, Bin Huang<sup>a</sup>, Zhen Meng<sup>a</sup>, Yudong Jia<sup>a\*</sup>**

<sup>a</sup> Yellow Sea Fisheries Research Institute, Chinese Academy of Fishery Sciences; Qingdao Key  
Laboratory for Marine Fish Breeding and Biotechnology, Qingdao 266071, China

<sup>b</sup> College of Fisheries and Life Science, Shanghai Ocean University, Shanghai 201306, China

\* Corresponding author

**Supplementary table 1.** The yield and purity of total RNA in hypothalamus, pituitary, liver, and ovary during turbot ovarian development. Prevtg: previtellogenesis; Evtg: early vitellogenesis; Latvtg: late vitellogenesis; Mig-nucle: migratory nucleus; Atre: atresia.

| Tissues      | Stages    | Yield (ng/ $\mu$ l) | Purity (260/280) |
|--------------|-----------|---------------------|------------------|
| Hypothalamus | Prevtg    | 678.3               | 1.96             |
|              | Evtg      | 635.1               | 1.89             |
|              | Latvtg    | 1079.5              | 1.98             |
|              | Mig-nucle | 737.5               | 1.97             |
|              | Atre      | 535.2               | 1.98             |
| Pituitary    | Prevtg    | 308.9               | 1.93             |
|              | Evtg      | 322.2               | 1.85             |
|              | Latvtg    | 273.1               | 1.95             |
|              | Mig-nucle | 342.6               | 1.96             |
|              | Atre      | 362.5               | 1.97             |
| Ovary        | Prevtg    | 479.4               | 1.86             |
|              | Evtg      | 515.5               | 1.92             |
|              | Latvtg    | 466.7               | 1.98             |
|              | Mig-nucle | 354.0               | 1.94             |
|              | Atre      | 547.2               | 1.88             |
| Liver        | Prevtg    | 681.3               | 1.99             |
|              | Evtg      | 718.9               | 2.00             |
|              | Latvtg    | 446.2               | 1.91             |

|           |       |      |
|-----------|-------|------|
| Mig-nucle | 492.6 | 1.96 |
| Atre      | 822.4 | 1.97 |

---

**Supplementary table 2.** Standard deviations (SD) and correlation coefficient ( $r$ ) of the *ub* and *rsp4* based on their quantification cycle values analyzed by Bestkeeper. The standard deviation (SD) > 0.95 and discarded from the calculation of correlation coefficient.

| Tissue       | Factor | UB   | RP4  |
|--------------|--------|------|------|
| Hypothalamus | SD     | 2.14 | 1.61 |
|              | $r$    | -    | -    |
| Pituitary    | SD     | 1.45 | 1.53 |
|              | $r$    | -    | -    |
| Ovary        | SD     | 1.49 | 1.77 |
|              | $r$    | -    | --   |
| Liver        | SD     | 1.40 | 1.87 |
|              | $r$    | -    | -    |

### Supplementary Figure 1.

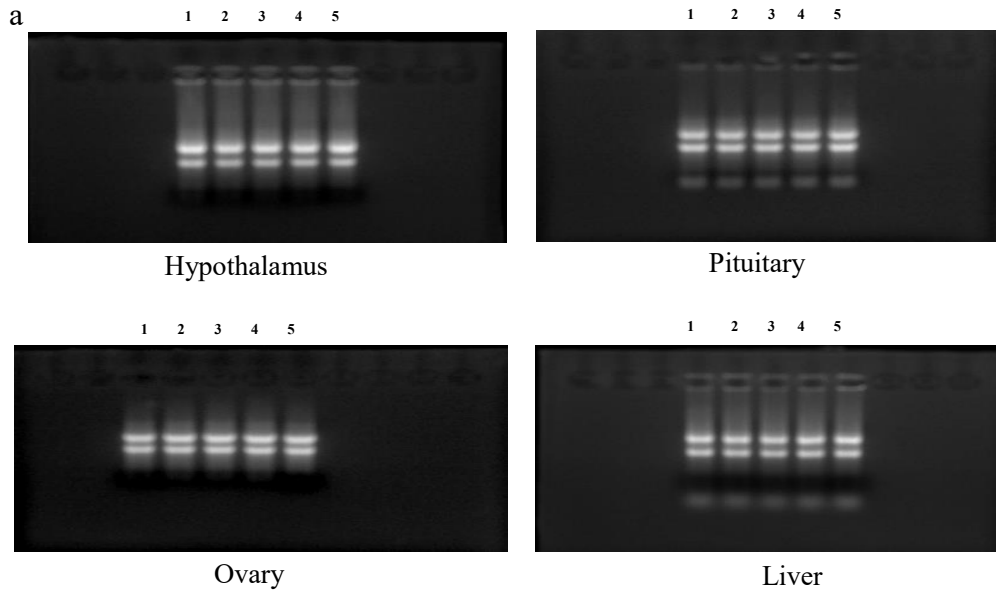

b

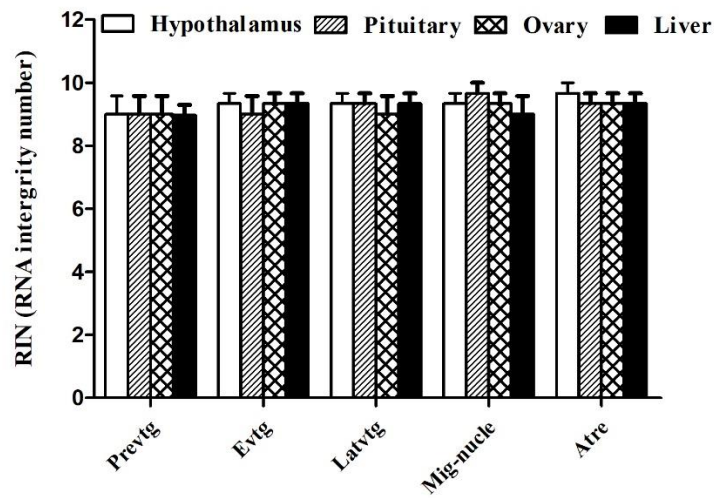

**Supplementary Figure 1:** The integrity of total RNA (a) agarose gel electrophoresis (b) RIN number in hypothalamus, pituitary, liver, and ovary during turbot ovarian development. RIN: RNA integrity number. Lanes from 1 to 5 are previtellogenesis, early vitellogenesis, late vitellogenesis, migratory nucleus and atresia stages, respectively. Other lanes were not used.

## Supplementary Figure 2

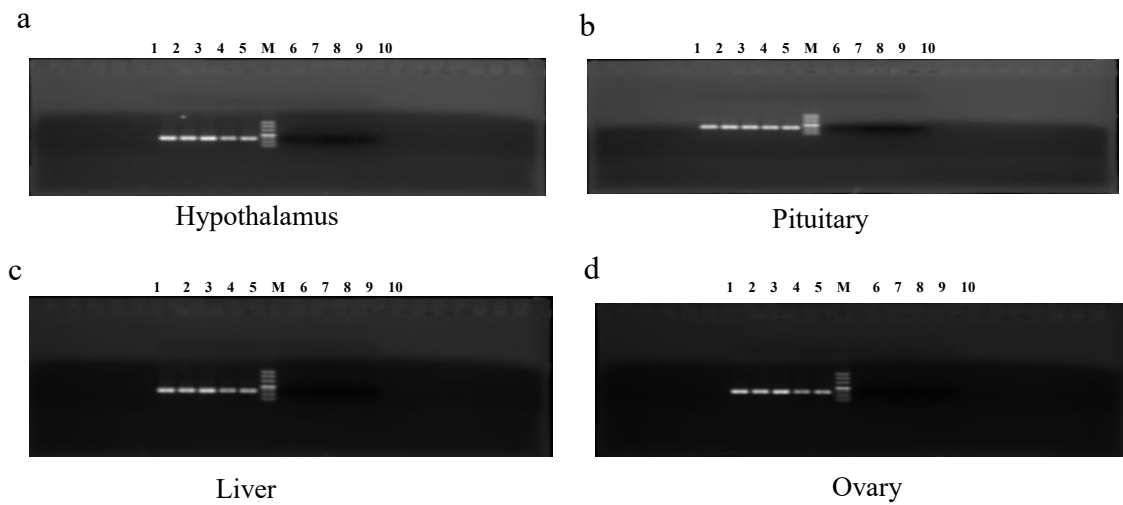

**Supplementary Figure 2:** The negative control without cDNA included in (a) hypothalamus, (b) pituitary, (c) liver, and (d) ovary during turbot ovarian development via qRT-PCR. 2% typical agarose gel stained with ethidium bromide showing the amplification of 18s. Left lanes from 1 to 5 are previtellogenesis, early vitellogenesis, late vitellogenesis, migratory nucleus and atresia stages, respectively. Right lanes from 6 to 10 are negative control. M: mark (50, 100, 150, 200, 300, 400, 500bp). Other lanes were not used.

**Supplementary Figure 3**

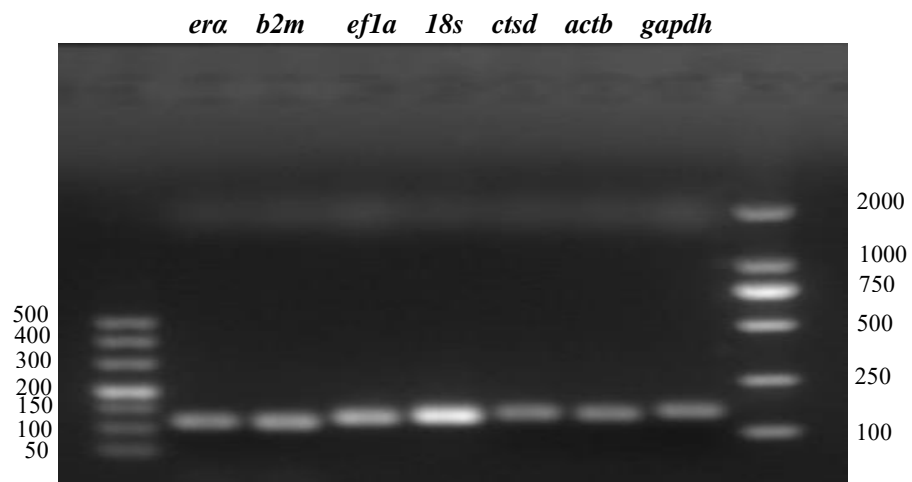

**Supplementary Figure 3:** 2% typical agarose gel stained with ethidium bromide showing the amplification of reference genes. The product size of *era* (115bp), *b2m* (112bp), *efla* (123bp), *18s* (130bp), *ctsd* (137bp), *actb* (138bp) and *gapdh* (144bp) on gel via agarose gel electrophoresis.

## Supplementary Figure 4

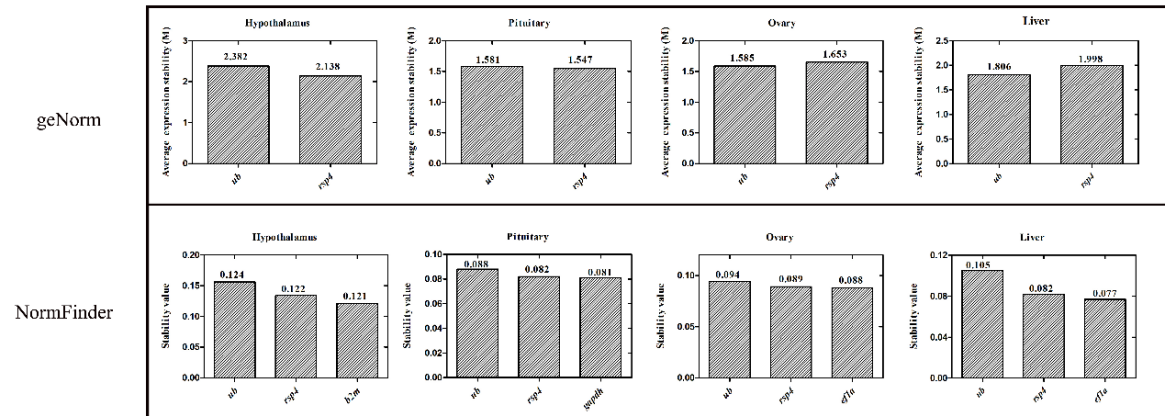

**Supplementary Figure 4:** Expression stability of *ub* and *rsp4* analyzed by geNorm and NormFinder. The M value of *ub* and *rsp4* above 1.5, while exhibited the high stability value (the value negatively correlated to gene stability). Meanwhile, standard deviation (SD) > 0.95 in **Supplementary table 2** data. Thus, these two genes considered the unstable genes and not include in the current study.
